# Supplementary material for: Transcriptomic signature associated with RNA-binding proteins for survival stratification of laryngeal cancer
Source: publisher site journal article supplement (doi:10.18632/aging.204234), 2022-08-18
Supplement: Supplementary file [file aging-v14i16-204234-supplementary-material-SD2.pdf]

## SUPPLEMENTARY TABLES

**Supplementary Table 1. Clinical information of TCGA cohort.**

| <b>Characteristics</b>                       | <b>Amount(proportion)</b>       |
|----------------------------------------------|---------------------------------|
| Age (>60y/ ≤60y)                             | 47(42.3%)/ 64(57.7%)            |
| Gender (Male/ Female)                        | 91(82%)/ 20(18%)                |
| Grade (G1-G2/ G3)                            | 82(73.9%)/ 29(26.1%)            |
| Status (Alive/ Dead)                         | 61(55%)/ 50(45%)                |
| TNM Stage (I-II/III-IV/ Not available)       | 12(10.8%)/ 86(77.5%)/ 13(11.7%) |
| T classification (T1-2/ T3-4/ Not available) | 20(18%)/ 78(70.3%)/ 13(11.7%)   |
| N classification (N0/ N+/ Not available)     | 43(38.7%)/ 55(49.5%)/ 13(11.7%) |

Abbreviation: Grade means pathological grade.

**Supplementary Table 2. The sequences of all primers used in this study.**

| <b>ID</b>                    | <b>GTPBP3</b>        | <b>KHDRBS3</b>          | <b>RBM38</b>          | <b>GAPDH</b>          |
|------------------------------|----------------------|-------------------------|-----------------------|-----------------------|
| <b>Forward primer(5'-3')</b> | GCAGGCGAGTTCACCAGAC  | TTCCAGTGGTTCGAGGGAAAC   | CTGCCGTACCACACTACCG   | GATGCCCCCATGTTTCGTCAT |
| <b>Reverse primer(5'-3')</b> | TTTCCCGGTGGATAAGGTCC | CTCGTGGTACTACAACCTCCAAC | ATGATGGGGTTCGGGTCTTTG | TAAGCAGTTGGTGGTGCAGG  |
