# Supplementary material for: Transcriptomic signature associated with RNA-binding proteins for survival stratification of laryngeal cancer
Source: Aging (Albany NY). 2022 Aug 18;14(16):6605–25. doi: 10.18632/aging.204234 (PMC9467394; doi:10.18632/aging.204234)
Supplement: Supplementary Table 3 [file aging-14-204234-s003.xlsx]

## Sheet: Sheet1
Supplementary Table 3. List of differentially expressed RBPs.
gene	logFC	p value	adjusted p value
Down-regulated DERBPs
APOBEC4	-4.65574	0.00157996	0.00601288
APOBEC2	-4.32433	0.000191728	0.00123373
RBFOX1	-4.09875	0.00199947	0.00731674
ENDOU	-3.89571	5.21313e-06	8.96409e-05
RBM20	-2.42744	2.67673e-07	1.56799e-05
DDX25	-2.19002	6.88506e-06	0.000107893
CPEB3	-2.08277	6.02422e-08	1.28683e-05
ZNF106	-2.07967	0.00139125	0.00540312
RBM47	-1.99394	1.17372e-07	1.28683e-05
CPEB4	-1.97516	1.01972e-07	1.28683e-05
PIH1D2	-1.97284	3.61544e-05	0.000352955
NSUN7	-1.83827	1.17977e-06	3.2134e-05
NOVA1	-1.83532	0.00428607	0.0134909
NYNRIN	-1.83428	1.1573e-06	3.2134e-05
TLR3	-1.79586	2.81025e-07	1.56799e-05
ADARB2	-1.75595	2.75065e-06	5.72478e-05
PPARGC1A	-1.75322	5.13636e-05	0.000445205
PAIP2B	-1.71859	1.25591e-07	1.28683e-05
PDCD4	-1.68892	2.4212e-08	1.07501e-05
PABPC1L2A	-1.52734	0.0144001	0.0340692
SECISBP2L	-1.43736	2.30511e-08	1.07501e-05
EIF4E3	-1.43519	7.14954e-08	1.28683e-05
RNASE4	-1.40951	4.10347e-05	0.000392992
ZFP36	-1.38023	2.49404e-05	0.000272611
SRRM4	-1.36107	2.34827e-05	0.000266315
SIDT1	-1.30899	6.49413e-06	0.000105298
AFF3	-1.29809	0.000110486	0.000793529
PARP4	-1.21567	2.94292e-07	1.56799e-05
ESRP2	-1.17803	2.1463e-05	0.000250779
TST	-1.16318	2.81421e-06	5.74675e-05
CSTF2	-1.16301	2.69862e-06	5.70565e-05
QARS	-1.07774	1.75581e-08	1.07501e-05
ADAD2	-1.05217	0.000259186	0.00151419
PDE12	-1.01468	4.76689e-08	1.28683e-05
STAU2	-0.990307	3.60323e-07	1.655e-05
MBNL3	-0.985985	1.95005e-05	0.000234006
AFF4	-0.981863	1.08466e-06	3.2106e-05
EIF1AY	-0.974171	0.00510803	0.0153275
RIOK3	-0.970551	3.91763e-06	7.05174e-05
HINT3	-0.949211	7.17441e-07	2.51482e-05
BAZ2B	-0.938687	1.62699e-06	4.08896e-05
PCF11	-0.928596	2.18907e-07	1.56799e-05
SRSF5	-0.927305	2.14407e-06	5.01225e-05
LRRFIP2	-0.915905	9.73175e-07	3.08636e-05
CPEB1	-0.884637	0.00678798	0.0184561
SAMHD1	-0.88178	0.00123554	0.00504827
YTHDC2	-0.870837	2.74749e-07	1.56799e-05
PPARGC1B	-0.852178	5.0494e-05	0.000442487
POLR2J3	-0.843952	0.0230987	0.0489928
AFF1	-0.835209	6.51307e-05	0.000528988
MKRN2	-0.831862	1.01895e-07	1.28683e-05
MTIF3	-0.831485	4.0327e-07	1.73276e-05
MRPS36	-0.823184	4.71449e-07	1.90294e-05
RBMS3	-0.822451	0.00484173	0.0148028
TRMT44	-0.820332	5.62528e-05	0.000472162
TDRD3	-0.8197	2.74652e-07	1.56799e-05
RBPMS	-0.809646	1.46088e-05	0.000188921
DHX32	-0.787505	2.93335e-06	5.74675e-05
LRRFIP1	-0.783929	3.18817e-06	5.98118e-05
CMTR2	-0.771429	3.12294e-06	5.94251e-05
RPL14	-0.752651	2.0892e-07	1.56799e-05
MRPS31	-0.745836	2.87617e-07	1.56799e-05
TRIM25	-0.73845	1.06968e-05	0.000148419
RBM3	-0.732651	5.72891e-05	0.000476932
GNL3	-0.723614	4.40509e-07	1.83362e-05
CNOT1	-0.709832	4.28525e-05	0.000401968
TRA2A	-0.708513	2.93378e-06	5.74675e-05
GTPBP2	-0.700889	7.38143e-05	0.000581779
RNASEL	-0.697607	0.000112785	0.000803368
GFM2	-0.677321	6.00465e-06	9.87431e-05
STRBP	-0.669708	0.00111275	0.00472035
YBX3	-0.662722	0.00237493	0.00848097
RPP14	-0.635599	5.75581e-06	9.58342e-05
ZFP36L2	-0.634136	0.000886209	0.00401507
SAP18	-0.629759	1.56095e-06	3.99844e-05
SRSF8	-0.628888	1.04886e-05	0.000148419
THOC7	-0.624907	6.42141e-07	2.37612e-05
ZC3H6	-0.619562	0.000496536	0.00248641
DCP1A	-0.617888	2.38193e-06	5.20119e-05
ESRP1	-0.615635	0.000650353	0.003063
DDX3X	-0.612442	9.88262e-06	0.000144655
SMAD3	-0.612002	8.81943e-05	0.000663699
PHAX	-0.611335	2.34426e-07	1.56799e-05
LENG9	-0.609942	0.0028909	0.00989892
RPUSD4	-0.605207	0.00273399	0.0094589
TIPARP	-0.603864	0.00365329	0.0118398
DNAJC17	-0.594025	0.000198611	0.00126579
CPEB2	-0.583895	0.00613542	0.0174251
EEF1B2	-0.581992	1.17423e-06	3.2134e-05
RPUSD3	-0.577569	0.000108883	0.00078822
TRMT10A	-0.569233	0.000122772	0.000862329
EIF3L	-0.556065	1.02775e-05	0.0001472
NARS	-0.554952	1.6715e-05	0.000210041
RBM15B	-0.553906	2.23653e-06	5.04925e-05
RPL15	-0.550929	2.22772e-06	5.04925e-05
ETF1	-0.543127	1.55908e-06	3.99844e-05
NHP2	-0.539174	3.62867e-05	0.000352955
MRPS10	-0.538363	5.63617e-05	0.000472162
SETD7	-0.537703	0.0173997	0.0394156
NSA2	-0.535088	4.87367e-05	0.000435687
RNH1	-0.535063	9.45882e-05	0.000698643
KHDRBS3	-0.533633	0.010676	0.0266799
SMAD9	-0.533474	0.0208656	0.0452391
DALRD3	-0.530549	0.000208979	0.00130686
RPSA	-0.527513	1.34839e-05	0.000176083
RPL29	-0.526512	8.6095e-07	2.79704e-05
DHX29	-0.525448	1.77256e-05	0.000214641
RPL32	-0.51603	7.59164e-07	2.59284e-05
DIMT1	-0.515778	0.00012961	0.000888165
GUF1	-0.510748	4.36533e-05	0.000403793
CIRBP	-0.507173	0.00137081	0.00538628
Up-regulated DERBPs
LSM7	0.501616	0.00605639	0.0172374
WDR4	0.501778	0.00944404	0.0241948
SMG9	0.502331	0.00165909	0.00627816
REXO4	0.503399	0.000941969	0.00421041
INTS8	0.508426	4.9626e-05	0.000437761
POLR2D	0.51144	2.31497e-05	0.000266315
CACTIN	0.514882	3.01247e-05	0.000316066
ZCCHC3	0.518521	0.00265887	0.00927125
RPP21	0.525949	0.00792588	0.0208642
TRIT1	0.526225	0.000430882	0.00224232
XPO5	0.527071	0.000231032	0.00139308
POLR2K	0.52935	0.000327021	0.00183794
RBPMS2	0.530773	0.0223233	0.0477786
EIF3B	0.533944	0.000354644	0.00193682
MRPL13	0.538092	0.00194515	0.00713951
MEX3D	0.540684	0.00491025	0.0148985
WRAP53	0.540866	0.00135055	0.00538628
PUF60	0.541663	7.37946e-05	0.000581779
EIF2AK4	0.542699	0.000444931	0.00229743
METTL1	0.542928	0.000268445	0.00155464
RPL8	0.544628	6.4651e-05	0.000528314
RNASEH2C	0.544953	0.00281171	0.00967752
CPSF1	0.54508	0.000547316	0.0026415
GTPBP3	0.552789	0.00116385	0.00485972
RBM38	0.553804	0.0154876	0.0359399
MAZ	0.554157	9.97563e-05	0.000726095
MRPL53	0.554216	0.00202985	0.00736991
PARP1	0.556604	0.000205418	0.00129064
ANGEL1	0.558733	0.00234181	0.00838521
DBR1	0.56059	0.000123005	0.000862329
PHF5A	0.561761	2.28234e-06	5.06679e-05
FASTKD3	0.561856	0.00056479	0.00270612
SART1	0.56459	3.06971e-05	0.000319441
MRPS12	0.56499	0.00504177	0.0152628
TUT1	0.565699	0.000282103	0.00161271
MRPL55	0.570777	0.000332524	0.00184551
MRPL14	0.570941	0.000250959	0.00148568
MRPL36	0.571685	0.00336584	0.0110699
PRIM1	0.580691	0.000182551	0.00118038
SNRPD2	0.584701	2.84138e-05	0.000305219
MRM1	0.590741	0.010047	0.0254906
ZNF579	0.593917	0.0223437	0.0477786
ILF2	0.597451	1.42505e-06	3.79634e-05
PPAN	0.597901	0.011918	0.0291298
BRIX1	0.604732	0.000547338	0.0026415
DARS2	0.605515	0.000714428	0.00330423
PARN	0.607626	1.18211e-06	3.2134e-05
CCDC86	0.612522	0.000272927	0.00156698
POP7	0.617369	2.14381e-05	0.000250779
LSM1	0.61921	0.0220983	0.0474781
U2AF1L4	0.62097	0.0125025	0.0302877
SRPK2	0.621075	0.00139134	0.00540312
CPSF4	0.622451	0.00104752	0.00455978
RPL35A	0.623157	5.27991e-06	8.96409e-05
ISY1	0.624159	0.000110808	0.000793529
CALR	0.626099	0.000516428	0.00252898
TRMT61A	0.629078	0.000366648	0.00197723
PTRH2	0.629129	0.000692552	0.00321421
AGO2	0.631154	0.000360635	0.00196068
THOC5	0.642035	8.60693e-06	0.000130278
RNASET2	0.644128	0.00552856	0.0160787
TCOF1	0.644748	0.000129584	0.000888165
U2SURP	0.647811	6.64039e-06	0.000105298
NOP2	0.649459	0.00101625	0.00445278
DCAF13	0.649653	2.49689e-05	0.000272611
PRPF4	0.650461	8.21542e-05	0.000625311
CD3EAP	0.650689	0.000410322	0.00215307
PSMA6	0.65182	0.00011678	0.000827399
LSM4	0.651825	1.73737e-05	0.00021231
SMAD7	0.653194	0.0147768	0.0347138
LSM5	0.655093	0.000219823	0.00136188
SNRPA1	0.657268	0.000159316	0.00105054
AEN	0.661524	0.000391205	0.0020678
XPOT	0.661811	0.00119902	0.00497539
RP9	0.663216	8.36077e-05	0.000632758
NPM3	0.674722	0.000250947	0.00148568
DDX39A	0.679762	0.000247038	0.00147558
NUTF2	0.685267	2.6416e-05	0.000286066
EXOSC2	0.685267	1.20324e-05	0.000165229
DHX58	0.686075	0.0186401	0.0415901
R3HDM1	0.686353	3.68287e-06	6.81331e-05
TRMT1	0.687992	2.06598e-05	0.000245704
ZNF598	0.691298	3.01354e-05	0.000316066
ADAR	0.692945	0.000227039	0.00138723
PUS1	0.695279	0.000167669	0.00109478
GEMIN2	0.706893	6.63011e-05	0.000535231
DDX55	0.719451	2.87366e-06	5.74675e-05
AARS	0.720344	3.24396e-05	0.00032771
PUS7	0.72832	0.00175851	0.00659811
EMG1	0.729083	0.000378733	0.00200985
TSEN15	0.730778	3.4344e-05	0.000343956
THOC1	0.736409	0.010947	0.027204
NSUN5	0.740054	1.70573e-05	0.00021231
APOBEC3F	0.742386	0.0129645	0.0311709
DHX36	0.74413	4.87326e-05	0.000435687
TRMT112	0.745501	1.92377e-06	4.67535e-05
DNMT1	0.758301	0.00014131	0.000945852
DDX39B	0.758434	0.00370353	0.0119736
MRPL47	0.760339	5.33456e-05	0.000455489
RBM19	0.763503	7.25342e-05	0.000578536
LSG1	0.769179	1.22686e-05	0.000166753
TRMT12	0.769679	3.63024e-05	0.000352955
IPO9	0.773445	3.36923e-07	1.655e-05
DDX60L	0.796084	0.0164137	0.0378384
RPP25	0.800018	0.0011465	0.00480231
EXOSC4	0.804869	2.35925e-05	0.000266315
DDX58	0.805939	0.0216075	0.0465747
SNRPB	0.812174	1.07648e-06	3.2106e-05
TRMU	0.829526	9.50385e-06	0.000140657
BICC1	0.830516	0.00331816	0.0109672
MAGOHB	0.832879	2.90198e-05	0.000309235
CTU1	0.833106	0.00208892	0.00752273
ADARB1	0.844193	0.00121651	0.00500322
RUVBL1	0.844344	7.63743e-06	0.000118291
BRCA1	0.860649	3.24758e-05	0.00032771
PRR3	0.863733	6.41662e-07	2.37612e-05
DDX60	0.880114	0.0236317	0.0497273
NCBP2	0.886006	1.04321e-07	1.28683e-05
ZC3HAV1L	0.968101	0.0104241	0.0261022
EIF2AK2	0.972438	1.00837e-05	0.000145994
PTRH1	0.975547	0.0171612	0.0391416
RNASEH2A	0.983071	2.43187e-06	5.22459e-05
POLR2H	1.03507	8.54375e-07	2.79704e-05
SPATS2	1.04242	1.14621e-07	1.28683e-05
USB1	1.08355	6.71716e-07	2.41818e-05
HENMT1	1.08988	0.00345907	0.0113206
DZIP1L	1.09257	0.00582376	0.0167182
WARS	1.09382	0.00621646	0.0175803
LARP6	1.09481	0.00100115	0.00441568
SMAD6	1.09853	0.00130816	0.00527388
DZIP1	1.10768	0.000173438	0.00112692
BOP1	1.13101	1.06093e-06	3.2106e-05
CMSS1	1.14244	1.82271e-07	1.56799e-05
PCBP3	1.14494	0.00490105	0.0148985
FBXO17	1.14651	0.00240902	0.00857971
RNASE2	1.1508	0.00574554	0.0165293
RSRC1	1.17417	2.51073e-07	1.56799e-05
PARP12	1.17925	1.93051e-06	4.67535e-05
CAPRIN2	1.18336	6.27558e-05	0.000515992
ZC3H12D	1.19564	0.000953246	0.00424657
RDM1	1.33914	0.00477148	0.0147083
KHDC1	1.34616	9.10747e-06	0.000136305
MEX3A	1.34982	0.0010956	0.00467832
TDRD6	1.35142	0.000194524	0.0012457
APOBEC3H	1.43466	0.001808	0.0067349
IFIT3	1.48542	0.021609	0.0465747
EXO1	1.53248	8.85493e-08	1.28683e-05
IFIT2	1.61214	0.00194568	0.00713951
PABPC1L	1.69588	0.000215967	0.00134424
IFIT1	1.71688	0.0104252	0.0261022
OASL	1.72731	0.00173332	0.006522
MEX3B	1.79797	1.06874e-05	0.000148419
PLD6	1.81141	2.23996e-07	1.56799e-05
NANOS3	1.85924	0.000230537	0.00139308
DNMT3B	1.87413	6.42194e-07	2.37612e-05
TERT	1.88114	0.00313537	0.0105135
CSDC2	1.90747	0.00791884	0.0208642
DAZL	1.99569	0.00345049	0.0113203
CELF5	2.00506	5.21704e-05	0.000448329
EIF5A2	2.04524	3.07799e-07	1.57688e-05
RBFOX3	2.1798	0.0008053	0.00366095
PTGES3L-AARSD1	2.29502	1.24758e-05	0.000167856
RPL39L	2.32839	4.25374e-06	7.55465e-05
IGF2BP2	2.34665	2.14488e-06	5.01225e-05
L1TD1	2.53271	0.00653391	0.0180897
MOV10L1	2.59273	3.58022e-07	1.655e-05
AFF2	2.79142	0.000619464	0.00295744
MSI1	3.71064	0.000513666	0.00252494
TDRD5	4.49213	0.00401599	0.0126761
KHDC1L	4.63675	8.21455e-05	0.000625311
RNASE10	5.4493	5.31654e-06	8.96409e-05
RBM46	5.50982	0.0173573	0.0394156
IGF2BP1	6.32823	3.76872e-07	1.67331e-05
LIN28B	6.52246	0.00991015	0.0252396
